# Supplementary material
Source: PubMed Central journal article supplement (PMC3277536)
Supplement: 1121077109_pnas.201121077SI.pdf [file 1121077109_pnas.201121077SI.pdf]

# Supporting Information

Meyer et al. 10.1073/pnas.1121077109

**Table S1. Behavioral results for the social working memory task**

|               | Two friends       |      | Three friends     |      | Four friends |      |
|---------------|-------------------|------|-------------------|------|--------------|------|
|               | Mean              | SD   | Mean              | SD   | Mean         | SD   |
| Accuracy      | 71%* <sup>†</sup> | 0.12 | 60%               | 0.15 | 58%          | 0.08 |
| Response time | 1.6 <sup>b</sup>  | 0.29 | 1.72 <sup>‡</sup> | 0.34 | 1.9          | 0.29 |

\*Two names is significantly different from three names.

<sup>†</sup>Two names is significantly different from four names.

<sup>‡</sup>Three names is significantly different from four names.

**Table S2. Brain regions that parametrically increase as a function of social working memory load**

| Region                          | Laterality | x   | y   | z   | t     | k     |
|---------------------------------|------------|-----|-----|-----|-------|-------|
| <b>Delay period</b>             |            |     |     |     |       |       |
| DMPFC                           | R          | 12  | 29  | 31  | 5.06  | 151   |
|                                 | L          | -12 | 38  | 49  | 3.25  | 199   |
| PC/PCC                          | R          | 0   | -61 | 46  | 8.43  | 1,783 |
| TPJ                             | L          | -42 | -70 | 40  | 4.53  | 190   |
| DLPFC                           | L          | -45 | 17  | 28  | 11.92 | 2,356 |
|                                 | R          | 36  | 29  | 25  | 5     | 299   |
| SMA                             | L          | -9  | 14  | 55  | 7.44  | 287   |
| Superior parietal lobule        | R          | 30  | -67 | 58  | 6.24  | 358   |
| Pallidum                        | L          | -21 | -4  | 7   | 4.16  | 138   |
| Anterior Insula                 | R          | 33  | 23  | 1   | 4.83  | 69    |
|                                 | L          | -33 | 20  | 1   | 5.77  | 147   |
|                                 | R          | 36  | -58 | 49  | 5.98  | 355   |
| Cerebellum                      | R          | 12  | -73 | -26 | 4.8   | 95    |
| <b>Probe response</b>           |            |     |     |     |       |       |
| DMPFC                           | L          | -3  | 47  | 28  | 5.89  | 861   |
|                                 | R          | 15  | 35  | 58  | 6.03  | 394   |
|                                 | R          | 3   | 41  | 37  | 5.3   | —     |
|                                 | R          | 9   | 47  | 52  | 3.95  | —     |
|                                 | R          | 0   | 32  | 46  | 3.81  | —     |
| MPFC                            | L          | -6  | 56  | -5  | 4.35  | 58    |
| PC/PCC                          | R          | 0   | -61 | 34  | 7.45  | 690   |
| TPJ                             | L          | -48 | -67 | 43  | 7.17  | 437   |
| DLPFC                           | R          | 30  | 17  | 61  | 6.43  | 382   |
|                                 | L          | -39 | 5   | 58  | 6.61  | 310   |
| SMA                             | L          | -6  | 20  | 64  | 5.53  | 132   |
| Superior parietal lobule        | R          | 57  | -58 | 40  | 7.57  | 240   |
| Inferior frontal gyrus          | L          | -48 | 38  | -5  | 5.04  | 270   |
| Ventrolateral prefrontal cortex | L          | -33 | 56  | 4   | 5.77  | 582   |
| Anterior insula                 | L          | -33 | 17  | -5  | 4.96  | 153   |
|                                 | R          | 33  | 20  | -8  | 4.14  | 68    |
| Thalamus                        | L          | -12 | -16 | 16  | 4.69  | 340   |
| Middle temporal sulcus          | L          | -57 | -43 | -8  | 4.63  | 98    |
|                                 | R          | 42  | -67 | 49  | 5     | 389   |
| Cerebellum                      | R          | 6   | -55 | -50 | 4.96  | 168   |
|                                 | R          | 33  | -61 | -41 | 7.62  | 259   |
|                                 | L          | -30 | -79 | -32 | 5.38  | 124   |

**Table S3. Regions showing social load dependent increases during the delay period of social working memory trials that correlate with trait-level perspective-taking ability**

| Region    | Laterality | x  | y   | z  | t    | k   |
|-----------|------------|----|-----|----|------|-----|
| MPFC      | L          | -6 | 62  | 1  | 6.95 | 286 |
| Precuneus | L          | -9 | -49 | 13 | 4.57 | 55  |
